# Supplementary material for: Selective laser processing of particle accelerator beam screen surfaces for electron cloud mitigation
Source: Royal Society of Chemistry journal article supplement (doi:10.1039/d4lf00372a), 2025-01-01
Supplement: d4lf00372a2.pdf [file d4lf00372a2.pdf]

## Selective laser processing of particle accelerator beam screen surfaces for electron cloud mitigation

Elena Bez,<sup>a,b</sup> Ana Karen Reascos Portilla,<sup>a</sup> Valentine Petit,<sup>a</sup> Konstantinos Paraschou,<sup>a</sup>  
Lotta Methner,<sup>a</sup> Kristóf Brunner,<sup>a</sup> Patrick Krkotić,<sup>a</sup> Yasemin Askar,<sup>a</sup> Sergio Calatroni,<sup>a</sup>  
Mauro Taborelli,<sup>a</sup> and Marcel Himmerlich<sup>a</sup>

<sup>a</sup> CERN, European Organization for Nuclear Research, 1211 Geneva 23, Switzerland

<sup>b</sup> University of Leipzig, Linnéstraße 5, 04103 Leipzig, Germany

**The supplementary information contains ASCII files of the data shown in the manuscript plots:**

### **Fig. 3 – Electron density plots (4 files: *Fig3\_a.txt*, *Fig3\_b.txt*, *Fig3\_c.txt*, *Fig3\_d.txt*)**

1<sup>st</sup> column: x coordinate in mm

2<sup>nd</sup> column: y coordinate in mm

3<sup>rd</sup> column: electron density  $\rho$  in  $\text{m}^{-3}$

### **Fig4\_profile.txt – Topography profile**

1<sup>st</sup> column: y coordinate in m

2<sup>nd</sup> column: z coordinate in m

### **Fig4\_map.txt – Topography map**

1<sup>st</sup> column: x coordinate in m

2<sup>nd</sup> column: y coordinate in m

3<sup>rd</sup> column: z coordinate in m

### **Fig6.txt – Secondary Electron Yield**

1<sup>st</sup> column: electron energy in eV

2<sup>nd</sup> column: SEY top corner (no unit)

3<sup>rd</sup> column: SEY bottom corner (no unit)

***Fig7\_main.txt – particulate density vs. SEY***

1<sup>st</sup> column: SEY maximum (no unit)

2<sup>nd</sup> column: density of detached particles in  $\text{cm}^{-2}$

***Fig7\_inset – Particulate density vs. diameter***

1<sup>st</sup> column: equivalent circular diameter round in  $\mu\text{m}$

2<sup>nd</sup> column: density of detached particles in  $\text{cm}^{-2}$

***Fig8\_a.txt – SEY maximum during conditioning***

1<sup>st</sup> column: 15 K – electron dose in  $\text{C mm}^{-2}$

2<sup>nd</sup> column: 15 K – average of SEY (no unit)

3<sup>rd</sup> column: 15 K – error of SEY (no unit)

4<sup>th</sup> column: RT – electron dose in  $\text{C mm}^{-2}$

5<sup>th</sup> column: RT – average of SEY (no unit)

6<sup>th</sup> column: RT – error of SEY (no unit)

***Fig8\_b.txt – SEY during conditioning***

1<sup>st</sup> column: electron energy in eV

2<sup>nd</sup> column: RT – average of SEY at electron dose  $2.3\text{E-}7 \text{ C mm}^{-2}$  (no unit)

3<sup>rd</sup> column: 15 K – average of SEY at electron dose  $4.6\text{E-}7 \text{ C mm}^{-2}$  (no unit)

4<sup>th</sup> column: 15 K – average of SEY at electron dose  $4.9\text{E-}4 \text{ C mm}^{-2}$  (no unit)

5<sup>th</sup> column: 15 K – average of SEY at electron dose  $1.4\text{E-}2 \text{ C mm}^{-2}$  (no unit)

6<sup>th</sup> column: RT – average of SEY at electron dose  $2.3\text{E-}7 \text{ C mm}^{-2}$  (no unit)

7<sup>th</sup> column: RT – average of SEY at electron dose  $3.6\text{E-}4 \text{ C mm}^{-2}$  (no unit)

8<sup>th</sup> column: RT – average of SEY at electron dose  $2.6\text{E-}2 \text{ C mm}^{-2}$  (no unit)

***Fig. 9 – XPS spectra (4 files with doses indicated: Fig9\_O1s\_RT.txt , Fig9\_O1s\_15K.txt , Fig9\_Cu2p\_RT.txt , Fig9\_Cu2p\_15K.txt )***

1<sup>st</sup> column: binding energy in eV

2<sup>nd</sup> column: normalised intensity (no unit)

***Fig9\_conc.txt* – carbon surface concentration**

1<sup>st</sup> column: RT – electron dose in  $C\ mm^{-2}$

2<sup>nd</sup> column: RT – Carbon atomic concentration in %

3<sup>rd</sup> column: 15 K – electron dose in  $C\ mm^{-2}$

4<sup>th</sup> column: 15 K – Carbon atomic concentration in %

***Fig10.txt* – ratio of real part of the longitudinal beam impedance**

1<sup>st</sup> column: frequency in GHz

2<sup>nd</sup> column: ratio (no unit)

3<sup>rd</sup> column: lower Error (no unit)

4<sup>th</sup> column: upper Error (no unit)

***Fig11\_left.txt* – map of normalized magnetic field strength distribution:**

1<sup>st</sup> column: x coordinate in m

2<sup>nd</sup> column: y coordinate in m

3<sup>rd</sup> column: normalised RF magnetic field strength (no unit)

***Fig11\_right.txt* – angular dependence of normalized magnetic field strength at BS surface:**

1<sup>st</sup> column: angle phi in degrees

2<sup>nd</sup> column: normalised RF magnetic field strength (no unit)
